# Supplementary material for: Effect of the GC content of DNA on the distribution of UVB-induced bipyrimidine photoproducts
Source: Royal Society of Chemistry journal article supplement (doi:10.1039/b719929e), 2008-04-03

### Supplementary information

**Table S1:** Frequency of the four bipyrimidine dinucleotides in a series of 99 bacteria with increasing GC content (% GC). These values were used to draw Figure 1.

| Bacterial species                                                        | Accession number | %GC  | TT     | TC     | CT     | CC     |
|--------------------------------------------------------------------------|------------------|------|--------|--------|--------|--------|
| <i>Buchnera aphidicola</i> str. Bp ( <i>Baizongia pistaciae</i> )        | NC 004545        | 25.3 | 0.1540 | 0.0449 | 0.0430 | 0.0196 |
| <i>Buchnera aphidicola</i> str. APS ( <i>Acyrtosiphon pisum</i> )        | NC 002528        | 26.4 | 0.1522 | 0.0492 | 0.0452 | 0.0209 |
| Aster yellows witches'-broom phytoplasma AYWB                            | NC 007716        | 26.8 | 0.1743 | 0.0449 | 0.0451 | 0.0250 |
| <i>Arcobacter butzleri</i> RM4018                                        | NC 009850        | 27.0 | 0.1546 | 0.0512 | 0.0543 | 0.0196 |
| <i>Candidatus Blochmannia floridanus</i>                                 | NC 005061        | 27.4 | 0.1301 | 0.0474 | 0.0416 | 0.0220 |
| <i>Borrelia afzelii</i> PKo                                              | NC 008277        | 27.8 | 0.1569 | 0.0524 | 0.0551 | 0.0262 |
| <i>Clostridium perfringens</i> ATCC 13124                                | NC 008261        | 28.0 | 0.1413 | 0.0541 | 0.0649 | 0.0272 |
| <i>Clostridium perfringens</i> SM101                                     | NC 008262        | 28.0 | 0.1433 | 0.0550 | 0.0654 | 0.0274 |
| <i>Clostridium perfringens</i> str13                                     | NC 003366        | 28.0 | 0.1416 | 0.0553 | 0.0661 | 0.0279 |
| <i>Candidatus Pelagibacter ubique</i> HTCC1062                           | NC 007205        | 29.0 | 0.1448 | 0.0511 | 0.0543 | 0.0266 |
| <i>Campylobacter jejuni</i> RM1221                                       | NC 003912        | 30.3 | 0.1513 | 0.0487 | 0.0579 | 0.0256 |
| <i>Prochlorococcus marinus</i> MIT9312                                   | NC 007577        | 31.2 | 0.1392 | 0.0583 | 0.0585 | 0.0308 |
| <i>Methanococcus maripaludis</i> S2                                      | NC 005791        | 33.0 | 0.1372 | 0.0556 | 0.0481 | 0.0332 |
| <i>Baumannia cicadellincola</i> str. Hc ( <i>Homalodisca coagulata</i> ) | NC 007984        | 33.2 | 0.1096 | 0.0466 | 0.0583 | 0.0280 |
| <i>Candidatus Protochlamydia amoebophila</i> UWE25                       | NC 005861        | 34.7 | 0.1337 | 0.0599 | 0.0577 | 0.0331 |
| <i>Bacillus anthracis</i> str. 'Ames Ancestor'                           | NC 007530        | 35.2 | 0.1193 | 0.0572 | 0.0536 | 0.0321 |
| <i>Bacillus thuringiensis</i> serovar konkukian str. 97-27               | NC 005957        | 35.4 | 0.1191 | 0.0571 | 0.0536 | 0.0321 |
| <i>Bacillus thuringiensis</i> str. Al Hakam                              | NC 008600        | 35.4 | 0.1185 | 0.0567 | 0.0533 | 0.0320 |
| <i>Alkaliphilus oremlandii</i> OhLAs                                     | NC 009922        | 36.2 | 0.1097 | 0.0596 | 0.0586 | 0.0392 |
| <i>Alkaliphilus metalliredigens</i> QYMF                                 | NC 009633        | 36.8 | 0.1091 | 0.0595 | 0.0594 | 0.0422 |
| <i>Bartonella henselae</i> str. Houston-1                                | NC 005956        | 38.2 | 0.1150 | 0.0573 | 0.0532 | 0.0381 |
| <i>Bartonella bacilliformis</i> KC583                                    | NC 008783        | 38.2 | 0.1157 | 0.0561 | 0.0536 | 0.0343 |
| <i>Bartonella quintana</i> str. Toulouse                                 | NC 005955        | 38.8 | 0.1143 | 0.0579 | 0.0537 | 0.0390 |
| <i>Acinetobacter baumannii</i> ATCC 17978                                | NC 009085        | 38.9 | 0.1105 | 0.0518 | 0.0542 | 0.0372 |
| <i>Vibrio angustum</i> S14                                               |                  | 39.6 | 0.1544 | 0.0779 | 0.0801 | 0.0520 |
| <i>Pseudoalteromonas haloplanktis</i> TAC125 chromosome I                | NC 007481        | 40.1 | 0.1063 | 0.0392 | 0.0570 | 0.0380 |
| <i>Chlamydia muridarum</i> Nigg                                          | NC 002620        | 40.3 | 0.1056 | 0.0675 | 0.0689 | 0.0433 |
| <i>Acinetobacter</i> sp. ADP1                                            | NC 005966        | 40.4 | 0.1020 | 0.0559 | 0.0516 | 0.0390 |
| <i>Chlamydia pneumoniae</i> AR39                                         | NC 002179        | 40.6 | 0.1019 | 0.0697 | 0.0716 | 0.0433 |
| <i>Bacillus pumilus</i> SAFR-032                                         | NC 009848        | 41.3 | 0.1017 | 0.0669 | 0.0580 | 0.0396 |
| <i>Actinobacillus pleuropneumoniae</i> L20                               | NC 009053        | 41.3 | 0.1115 | 0.0546 | 0.0443 | 0.0424 |
| <i>Chlamydia trachomatis</i> DIUW-3/CX                                   | NC 000117        | 41.3 | 0.0993 | 0.0695 | 0.0713 | 0.0429 |
| <i>Anabaena variabilis</i> ATCC 29413                                    | NC 007413        | 41.4 | 0.0982 | 0.0553 | 0.0600 | 0.0474 |
| <i>Anaplasma phagocytophilum</i> HZ                                      | NC 007797        | 41.6 | 0.0870 | 0.0561 | 0.0668 | 0.0403 |
| <i>Pyrococcus abyssi</i> GE5                                             | NC 000868        | 42.0 | 0.0854 | 0.0714 | 0.0755 | 0.0612 |
| <i>Carboxydotherrmus hydrogenoformans</i> Z-2901                         | NC 007503        | 42.0 | 0.1173 | 0.0506 | 0.0543 | 0.0644 |
| <i>Psychrobacter arcticus</i> 273-4                                      | NC 007204        | 42.7 | 0.0881 | 0.0524 | 0.0573 | 0.0397 |
| <i>Bacteroides thetaiotaomicron</i> VPI-5482                             | NC 004663        | 42.9 | 0.0908 | 0.0657 | 0.0562 | 0.0477 |
| <i>Bacteroides fragilis</i> NCTC 9343                                    | NC 003228        | 43.1 | 0.0907 | 0.0646 | 0.0548 | 0.0505 |
| <i>Bacteroides fragilis</i> YCH46                                        | NC 006347        | 43.2 | 0.0907 | 0.0649 | 0.0549 | 0.0507 |
| <i>Aquifex aeolicus</i> VF5                                              | NC 000918        | 43.3 | 0.1019 | 0.0683 | 0.0722 | 0.0581 |
| <i>Bacillus subtilis</i> subsp. <i>subtilis</i> str. 168                 | NC 000964        | 43.5 | 0.0989 | 0.0658 | 0.0564 | 0.0460 |
| <i>Bacillus halodurans</i> C-125                                         | NC 002570        | 43.7 | 0.0961 | 0.0670 | 0.0553 | 0.0466 |
| <i>Campylobacter curvus</i> 525.92                                       | NC 009715        | 44.5 | 0.1008 | 0.0604 | 0.0599 | 0.0410 |
| <i>Bacillus clausii</i> KSM-K16                                          | NC 006582        | 44.8 | 0.0989 | 0.0586 | 0.0543 | 0.0486 |
| <i>Actinobacillus succinogenes</i> 130Z                                  | NC 009655        | 44.9 | 0.1019 | 0.0550 | 0.0393 | 0.0522 |
| <i>Vibrio vulnificus</i> CMCP6 chromosome I                              | NC 004459        | 45.0 | 0.0878 | 0.0574 | 0.0578 | 0.0541 |

|                                                                        |           |      |        |        |        |        |
|------------------------------------------------------------------------|-----------|------|--------|--------|--------|--------|
| <i>Bacillus licheniformis</i> ATCC 14580                               | NC 006270 | 46.2 | 0.0956 | 0.0695 | 0.0537 | 0.0508 |
| <i>Chlorobium phaeobacteroides</i> DSM 266                             | NC 008639 | 48.4 | 0.0831 | 0.0717 | 0.0576 | 0.0587 |
| <i>Archaeoglobus fulgidus</i> DSM 4304                                 | NC 000917 | 48.6 | 0.0794 | 0.0735 | 0.0723 | 0.0607 |
| <i>Anaplasma marginale</i> str. St. Maries                             | NC 004842 | 49.8 | 0.0684 | 0.0549 | 0.0629 | 0.0618 |
| <i>Escherichia coli</i> K12                                            | NC 000913 | 50.0 | 0.0732 | 0.0576 | 0.0509 | 0.0586 |
| <i>Nitrosococcus oceani</i> ATCC 19707                                 | NC 007484 | 50.3 | 0.0664 | 0.0624 | 0.0640 | 0.0741 |
| <i>Bdellovibrio bacteriovorus</i> HD100                                | NC 005363 | 50.6 | 0.0797 | 0.0675 | 0.0562 | 0.0641 |
| <i>Salmonella typhimurium</i> LT2                                      | NC 003197 | 52.0 | 0.0698 | 0.0572 | 0.0500 | 0.0617 |
| <i>Alcanivorax borkumensis</i> SK2                                     | NC 008260 | 54.7 | 0.0612 | 0.0547 | 0.0555 | 0.0744 |
| <i>Morella thermoacetica</i> ATCC 39073                                | NC 007644 | 55.0 | 0.0618 | 0.0516 | 0.0572 | 0.0968 |
| <i>Pelobacter carbinolicus</i> DMS 2380                                | NC 007498 | 55.1 | 0.0643 | 0.0637 | 0.0504 | 0.0775 |
| <i>Candidatus Desulfococcus oleovorans</i> Hxd3                        | NC 009943 | 56.1 | 0.0650 | 0.0575 | 0.0480 | 0.0906 |
| <i>Chlorobium tepidum</i> TLS                                          | NC 002932 | 56.5 | 0.0581 | 0.0723 | 0.0558 | 0.0679 |
| <i>Brucella abortus</i> biovar 1 str. 9-941 chromosome I               | NC 006932 | 57.2 | 0.0592 | 0.0640 | 0.0494 | 0.0720 |
| <i>Aeromonas salmonicida</i> subsp. <i>salmonicida</i> A449            | NC 009348 | 58.2 | 0.0449 | 0.0612 | 0.0613 | 0.0831 |
| <i>Acidobacteria bacterium</i> Ellin345                                | NC 008009 | 58.4 | 0.0520 | 0.0713 | 0.0535 | 0.0681 |
| <i>Agrobacterium tumefaciens</i> str. C58 chromosome circular          | NC 003062 | 59.0 | 0.0509 | 0.0694 | 0.0498 | 0.0776 |
| <i>Bifidobacterium adolescentis</i> ATCC 15703                         | NC 008618 | 59.2 | 0.0462 | 0.0694 | 0.0457 | 0.0724 |
| <i>Synechococcus</i> sp WH8102                                         | NC 005070 | 59.4 | 0.0453 | 0.0658 | 0.0607 | 0.0837 |
| <i>Bifidobacterium longum</i> NCC2705                                  | NC 004307 | 60.1 | 0.0419 | 0.0667 | 0.0487 | 0.0778 |
| <i>Haloarcula marismortui</i> ATCC 43049 chromosome I                  | NC 006396 | 61.1 | 0.0515 | 0.0761 | 0.0610 | 0.0601 |
| <i>Aeromonas hydrophila</i> subsp. <i>hydrophila</i> ATCC 7966         | NC 008570 | 61.5 | 0.0381 | 0.0604 | 0.0603 | 0.0900 |
| <i>Arthrobacter aurescens</i> TC1                                      | NC 008711 | 62.4 | 0.0402 | 0.0638 | 0.0540 | 0.0920 |
| <i>Erythrobacter litoralis</i> HTCC2594                                | NC 007722 | 63.0 | 0.0394 | 0.0700 | 0.0511 | 0.0789 |
| <i>Natrosomonas pharaonis</i> DSM 2160                                 | NC 007426 | 63.1 | 0.0346 | 0.0795 | 0.0501 | 0.0788 |
| <i>Chromohalobacter salexigens</i> DSM 3043                            | NC 007963 | 63.9 | 0.0325 | 0.0658 | 0.0512 | 0.0829 |
| <i>Azoarcus</i> sp. EbN1                                               | NC 006513 | 64.7 | 0.0349 | 0.0691 | 0.0495 | 0.0773 |
| <i>Chromobacterium violaceum</i> ATCC 12472                            | NC 005085 | 64.8 | 0.0375 | 0.0562 | 0.0531 | 0.0875 |
| <i>Arthrobacter</i> sp. FB24 chromosome I                              | NC 008541 | 65.4 | 0.0377 | 0.0703 | 0.0585 | 0.1141 |
| <i>Sphingopyxis alaskensis</i> RB2256                                  | NC 008048 | 65.5 | 0.0351 | 0.0694 | 0.0446 | 0.0844 |
| <i>Bradyrhizobium</i> sp. ORS278                                       | NC 009445 | 65.5 | 0.0300 | 0.0718 | 0.0511 | 0.0797 |
| <i>Acidovorax</i> sp. JS42                                             | NC 008782 | 66.1 | 0.0315 | 0.0514 | 0.0528 | 0.0903 |
| <i>Acidothermus cellolyticus</i> 11B                                   | NC 008578 | 66.9 | 0.0296 | 0.0693 | 0.0441 | 0.0933 |
| <i>Azorhizobium caulinodans</i> ORS 571                                | NC 009937 | 67.0 | 0.0278 | 0.0648 | 0.0520 | 0.0981 |
| <i>Deinococcus radiodurans</i> R1 chromosome I                         | NC 001263 | 67.0 | 0.0402 | 0.0577 | 0.0604 | 0.0892 |
| <i>Caulobacter crescentus</i> CB15                                     | NC 002696 | 67.0 | 0.0292 | 0.0671 | 0.0526 | 0.0967 |
| <i>Acidiphilum cryptum</i> JF-5                                        | NC 009484 | 67.1 | 0.0284 | 0.0677 | 0.0463 | 0.0953 |
| <i>Caulobacter crescentus</i> CB15                                     | NC 002696 | 67.2 | 0.0292 | 0.0671 | 0.0526 | 0.0967 |
| <i>Azoarcus</i> sp. BH72                                               | NC 008702 | 67.9 | 0.0287 | 0.0592 | 0.0504 | 0.0906 |
| <i>Bordetella parapertussis</i> 12822                                  | NC 002928 | 68.1 | 0.0280 | 0.0524 | 0.0472 | 0.0922 |
| <i>Burkholderia pseudomallei</i> K96243 chromosome I                   | NC 006350 | 68.1 | 0.0285 | 0.0683 | 0.0412 | 0.0714 |
| <i>Acidovorax avenae</i> subsp. <i>citrulli</i> AAC00-1                | NC 008752 | 68.5 | 0.0263 | 0.0551 | 0.0508 | 0.0980 |
| <i>Nocardia farcinica</i> IFM 10152                                    | NC 006361 | 70.0 | 0.0186 | 0.0632 | 0.0437 | 0.1028 |
| <i>Frankia</i> sp Ccl3                                                 | NC 007777 | 70.1 | 0.0189 | 0.0672 | 0.0453 | 0.1100 |
| <i>Rubrobacter xylanophilus</i> DSM 9941                               | NC 008148 | 70.5 | 0.0197 | 0.0663 | 0.0613 | 0.1223 |
| <i>Saccharopolyspora erythraea</i> NRRL2338                            | NC 008142 | 71.1 | 0.0182 | 0.0641 | 0.0483 | 0.1038 |
| <i>Nocardioides</i> sp. JS 614                                         | NC 008699 | 71.4 | 0.0142 | 0.0691 | 0.0498 | 0.1059 |
| <i>Streptomyces coelicolor</i> A3(2)                                   | NC 003888 | 72.0 | 0.0159 | 0.0630 | 0.0482 | 0.1139 |
| <i>Clavibacter michiganensis</i> subsp. <i>michiganensis</i> NCPPB 382 | NC 009480 | 72.0 | 0.0123 | 0.0725 | 0.0468 | 0.0998 |
| <i>Frankia alni</i> ACN14a                                             | NC 008278 | 72.5 | 0.0123 | 0.0725 | 0.0468 | 0.0998 |
| <i>Anaeromyxobacter</i> sp. Fw109-5                                    | NC 009675 | 72.8 | 0.0146 | 0.0640 | 0.0433 | 0.1142 |
| <i>Anaeromyxobacter dehalogenans</i> 2CP-C                             | NC 007760 | 74.9 | 0.0136 | 0.0615 | 0.0489 | 0.1088 |

**Table S2:** Frequency of pyrimidine dinucleotides in the genomes of the studied species. All values are percentages (%). The proportion of C-containing bipyrimidine dinucleotides was also calculated.

|                                | <b>GC content</b> | TT   | TC  | CT  | CC   | <i>C-containing dinucleotides</i> |
|--------------------------------|-------------------|------|-----|-----|------|-----------------------------------|
| <i>Clostridium perfringens</i> | <b>28</b>         | 16.5 | 6.0 | 6.6 | 2.3  | <i>47.4</i>                       |
| <i>Vibrio angustum</i>         | <b>39.6</b>       | 15.4 | 7.8 | 8.0 | 5.2  | <i>57.6</i>                       |
| Calf Thymus                    | <b>42</b>         | 9.9  | 6.1 | 5.3 | 4.3  | <i>61.2</i>                       |
| <i>Salmonella typhimurium</i>  | <b>52</b>         | 7.0  | 5.7 | 5.0 | 6.2  | <i>70.8</i>                       |
| <i>Sphingopyxis alaskensis</i> | <b>65.5</b>       | 3.5  | 6.9 | 4.5 | 8.4  | <i>85.0</i>                       |
| <i>Micrococcus luteus</i>      | <b>72</b>         | 1.5  | 6.6 | 4.5 | 10.6 | <i>93.5</i>                       |

**Figure S1:** Determination of the dinucleotide frequency for *M. luteus* (72% GC) in the high GC content region. Values were interpolated from those of eight species exhibiting a similar GC content: *Nocardia farcinica* IFM 10152 (70% GC), *Frankia* sp. Cc13 (70.1), *Saccharopolyspora erythraea* NRRL 2338 (71.1), *Nocardioides* sp. JS614 (71.4), *Streptomyces coelicolor* A3(2) (72), *Clavibacter michiganensis* subsp. *michiganensis* NCPPB 382 (72), *Frankia alni* ACN14a (72.5), *Anaeromyxobacter dehalogenans* 2CP-C (74.9).

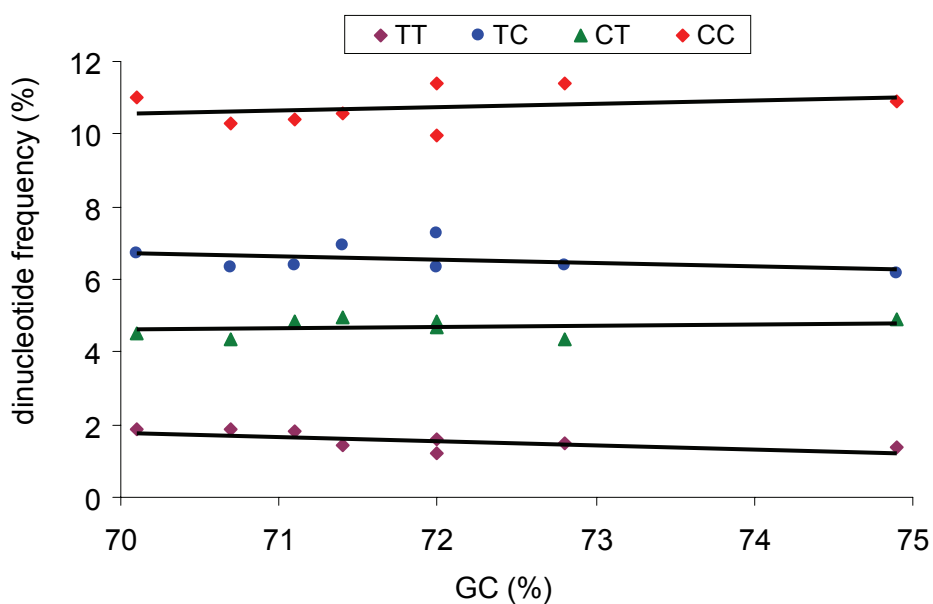

Supplement: b719929e.pdf [file b719929e.pdf]
